# More than a year after the onset of the CoVid-19 pandemic in the UK: lessons learned from a minimalistic model capturing essential features including social awareness and policy making

Miguel A. Durán-Olivencia<sup>a,1</sup> and Serafim Kalliadasis<sup>a,1</sup>

<sup>a</sup>Department of Chemical Engineering, Imperial College London, London SW7 2AZ, UK

This manuscript was compiled on April 15, 2021

1 **The number of new daily SARS-CoV-2 infections experienced an**  
2 **abrupt increase during the last quarter of 2020 in almost every Euro-**  
3 **pean country. The phenomenological explanation offered was a new**  
4 **mutation of the virus, first identified in the UK. We use publicly avail-**  
5 **able data in combination with a time-delayed controlled SIR model,**  
6 **which captures the effects of preventive measures and concomitant**  
7 **social response on the spreading of the virus. The model, which has**  
8 **a unique transmission rate, enables us to reproduce the waves of**  
9 **infection occurred in the UK. This suggests that the new SARS-CoV-2**  
10 **UK variant is as transmissible as previous strains. Our findings reveal**  
11 **that the sudden surge in cases was in fact related to the relaxation**  
12 **of preventive measures and social awareness. We also simulate the**  
13 **combined effects of restrictions and vaccination campaigns in 2021,**  
14 **demonstrating that lockdown policies are not fully effective to flatten**  
15 **the curve; fully effective mitigation can only be achieved via a vigor-**  
16 **ous vaccination campaign. As a matter of fact, incorporating recent**  
17 **data about vaccine efficacy, our simulations advocate that the UK**  
18 **might have overcome the worse of the CoVid-19 pandemic, provided**  
19 **that the vaccination campaign maintains a rate of approximately 140k**  
20 **jabs per day.**

1 The years 2020-2021 have been marked by the extraordinary  
2 CoVid-19 pandemic, and the exceptional social measures and  
3 restrictions needed to control the spread of the disease. Not  
4 surprisingly, a considerable amount of research has been de-  
5 voted to trying to forecast the evolution of the pandemic with  
6 the principal aim of anticipating new waves of infections (1).  
7 The most widely-used framework for epidemic model develop-  
8 ment and computational exploration splits society into three  
9 main categories (so-called compartments) according to their  
10 status with respect to the disease: susceptible (S), infectious  
11 (I) and recovered (R). A natural balance-oriented reasoning,  
12 originally put forward in the late 1920s by Kermack and McK-  
13 endrick (2), can then be used to obtain the so-called SIR model  
14 (Fig. 1.a), a nonlinear ordinary differential equation describing  
15 the time evolution of the population of the three categories,  
16 interconnected via two parameters: the transmission ( $\beta$ ) and  
17 recovery ( $\alpha$ ) rates. The ratio of these two give rise to the  
18 famous basic reproductive ( $\mathcal{R}_0 = \frac{\beta}{\alpha}$ ) rate. The simplicity and  
19 elegance of the SIR have made it a popular generic prototype  
20 for numerical and mathematical scrutiny. However, the model  
21 also introduces some important limitations which hamper its  
22 wide applicability. Specifically, it can only account for a single  
23 epidemic outbreak, and only takes into account infection and  
24 recovering events. To begin with, the contagious encounters  
25 are tacitly assumed to take effect automatically, i.e. whenever a

susceptible person meets an infected one, the former becomes  
infected. At the same time, the original SIR model cannot  
account for the effects associated with the social preventive  
response which characterises the *new normal*, e.g. social dis-  
tancing, mask wearing, limited commuting, remote working,  
or local curfews and lockdowns, to name but a few examples.  
These limitations will in turn impact the estimation of the  
intrinsic parameters  $\beta$  and  $\mathcal{R}_0$  by using SIR-like models. For  
instance, different values of  $\mathcal{R}_0$  are obtained for the same virus  
(hence the same inherent properties) under different social  
contexts, e.g. partial and full lockdown.

Despite the limitations, good fitting can be achieved over  
limited temporal windows (3–5). However, two serious draw-  
backs compromise the accuracy of such predictions: a) one  
cannot fit the whole temporal series, characterised by multiple  
infection waves, indeed the fit would eventually diverge; and  
b) the SIR model would never forecast a second or further  
upsurge in cases. Substantially refined versions of the SIR  
model have been put forward recently with the aim of includ-  
ing additional important effects, such as shield immunity (6)  
or exposure to the virus (7). These models are highly intelli-  
gent and mathematically elegant, however, their underlying  
assumption remains that infection occurs automatically. This  
in turn will necessarily restrict their time domain of applicabil-  
ity. It is clear that more work is needed. In particular, relaxing  
the assumption of automatic infection raises the exciting possi-  
bility of capturing the entire pandemic evolution from day  
zero up to date and accounting for the multiple waves of infec-  
tions already experienced. Indeed, to determine whether new  
variants of the SARS-CoV-2 are more transmissible than their  
predecessors, the data analysis must cover the entire pandemic  
outbreak and include the effects of preventive measures and  
contagion policies adopted by populations and governments,  
respectively. Many studies also fitted SIR-like models to data  
from the last stages of the first wave – even though as high-  
lighted earlier the models suffer from the inherent limitation  
of a single-wave prediction – thus effectively assuming that the  
epidemic was coming to an end. Yet, it was already known  
at the time that the number of cases was decreasing because  
of the preventive measures which in turn should have been  
sufficient to abandon the corresponding models. Thus, an

All authors contributed equally to this work.

The authors declare no competing interest.

<sup>1</sup>E-mails: Miguel A. Durán-Olivencia (m.duran-olivencia@imperial.ac.uk); Serafim Kalliadasis (s.kalliadasis@imperial.ac.uk)

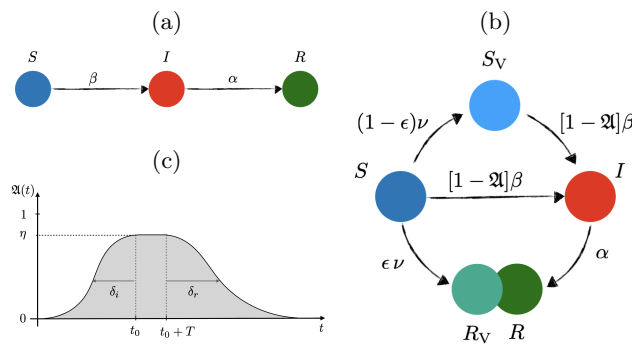

**Fig. 1.** Sketch of transitions in (a) free and (b) controlled SIR network model of disease transmission, and (c) preventive social response,  $\mathfrak{A}(t)$ .

67 alternative approach is called for.

68 The present work is set out as follows. Consideration of the  
 69 full-history of the data with a *controlled* SIR model (Fig. 1.b)  
 70 avoids the drawbacks of previous models, by capturing the  
 71 essence of how the new normal affects the number of infected  
 72 people. This unveils unique and constant  $\beta$  and  $\mathcal{R}_0$  for the  
 73 entire pandemic. Thousands of mutations have emerged in  
 74 the SARS-CoV-2 genome since the first outbreak in 2019,  
 75 but the UK strain, known as B.1.1.7, was reported at the  
 76 time as a more “aggressive” form of the virus, because of an  
 77 alarming surge in new cases thought to be correlated with  
 78 the new UK variant, and was one of the main reasons for  
 79 the lockdown imposed in the UK at the beginning of 2021,  
 80 e.g. Ref. (8). According to the law of parsimony: chose the  
 81 simplest explanation from those that fit. Indeed, our results  
 82 show that the fierce increase in cases is captured without the  
 83 need of a more transmissible variant. We then put forward  
 84 the hypothesis that genomic data during the pandemic might  
 85 have been overinterpreted. To test this hypothesis we carry  
 86 out a succinct analysis of data from a recent study which  
 87 links B.1.1.7 with significantly higher viral loads and claims  
 88 to provide evidence on why transmission was accelerating (9).  
 89 As far as our particular modelling approach is concerned, its  
 90 novelty is to include characteristic parameters which could be  
 91 pivotal in the decision-making process in the coming months.  
 92 For instance, there seems to be an *inertia of society* which plays  
 93 a crucial role on the flattening of the curve. For preventive  
 94 measures to be effective, these should be encouraged quite early  
 95 in the surge of cases, taking into consideration the inherent  
 96 social inertia, which typically leads up to a three-week delay up  
 97 until society gets to its maximum level of alert. We also account  
 98 for the effect of vaccination and show that *social relaxation*  
 99 as of April 2021 without fulfilling a sufficient vaccination rate  
 100 (determined below) will lead to a new wave of infections over  
 101 May-June 2021, independently of the more strict lockdown  
 102 currently imposed since January 2021 and relaxed gradually  
 103 as of April 12, 2021.

## 104 Minimalistic model including social awareness and policy making

105  
 106 **The model.** The controlled SIR model shown in Fig. 1.b (see  
 107 Methods for mathematical details) incorporates the social  
 108 awareness and policy making effects on the spreading of the  
 109 SARS-CoV-2. The main modifications to the basic SIR model  
 110 are: embodiment of control over the number of infectious

111 interactions that might occur at a given time via the function  
 112  $(1 - \mathfrak{A})$  which is multiplying the transmission rate  $\beta$ , with  
 113  $\mathfrak{A}$  having the general form showed in Fig. 1.c; inclusion of a  
 114 time delay for such preventive measures to take effect in re-  
 115 ducing the number of effective infectious interactions between  
 116 infected and susceptible people; accounting for vaccinations  
 117 not fully effective ( $\epsilon < 1$ ), which in turn leads to the in-  
 118 clusion of two new categories: susceptible after vaccination  
 119 ( $S_V$ ), and recovered/removed after vaccination ( $R_V$ ). These  
 120 facilitate incorporation of actual vaccination data within the  
 121 time-evolution simulations of the pandemic, enabling us to  
 122 estimate the effect that vaccines have had so far, and will  
 123 have in the next coming months, provided we know the rate  
 124 of efficacy of the vaccines. Here we take a conservative stance  
 125 adopting the efficacy value reported for the most widely deliv-  
 126 ered vaccine so far, i.e.  $\epsilon \sim 65\%$  (10). As we will illustrate,  
 127 the minimalistic model we put forward exhibits a distinct  
 128 predictive capability, and has been rightfully forecasting the  
 129 evolution of the daily new infections (Fig. 2).

**Comparison with observations and predictions.** Figure 2 re-  
 130 ports curve fits and predictions of the free and controlled SIR  
 131 models. The free version (Fig. 1.a) fits well the data of the first  
 132 wave of infections from March to June 2020, but completely  
 133 fails to predict any second or further wave. This is because  
 134 in a free SIR model the decay of the infected cases is only  
 135 possible when the pandemic is already in recession. [As we  
 136 know now and back in June 2020, this was not the reason  
 137 for the decrease in cases at the time; rather the reduction of  
 138 susceptible people was due to preventive measures.] Yet, it has  
 139 been quite common to use the first wave to extract estimates  
 140 for  $\beta$ ,  $\alpha$  and  $\mathcal{R}_0$ . Several works have published estimates  
 141 for these quantities even by using doubtful methodologies, e.g.  
 142 in (5), manual fitting of the data to the SIR model was per-  
 143 formed, effectively via a trial-and-error approach, on the basis  
 144 that rigorous non-linear fitting did not follow the data as well  
 145 as manual fitting. However, instead of imposing the SIR model  
 146 and changing the fitting method to achieve agreement with  
 147 the model, the disagreement with a nonlinear fit is instead a  
 148 strong indication that the model should have been abandoned.  
 149

150 Evidently, not only does the controlled SIR model (Fig. 1.b)  
 151 fits better the first-wave data (inset plot, Fig. 2.b), but also  
 152 captures the underlying reason for the decrease in cases from  
 153 mid April to August 2020, namely a wave of *social awareness*  
 154 ( $\mathfrak{A}$ ) which effectively reduced the number of susceptible people.  
 155 The function  $\mathfrak{A}$  embodies both contagion policies and the  
 156 efforts made by citizens to flatten the curve, e.g. wearing  
 157 masks, reducing travelling or self-isolating. Moreover, the  
 158 model correctly predicts a sudden rise in cases when society  
 159 relaxes, because the downtrend in new infections is not related  
 160 with the end of the pandemic but with a temporary removal of  
 161 susceptible candidates from the system. This is precisely what  
 162 happened from July to September 2020, and what eventually  
 163 led to the surge in cases in early September 2020. This sharp  
 164 increase immediately raised the alarm (11, 12), and  $\mathfrak{A}$  started  
 165 growing again, reaching a maximum effectiveness when the  
 166 three-tier restrictions system was imposed (13). However, these  
 167 measures were not sufficient to flatten the curve and a new  
 168 increase appeared in December 2020 because of a gradual  
 169 relaxation over the month of November. By incorporating  
 170 new waves of preventive measures in  $\mathfrak{A}$ , the model is able to  
 171 reproduce the above observations, as illustrated in Figs 2.b-e.

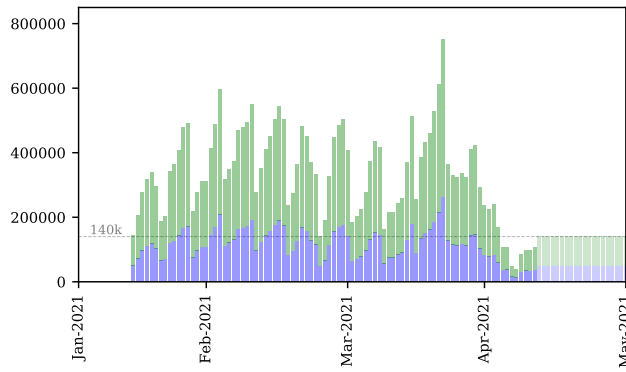

**Fig. 3.** Number of people who have received a first dose CoVid-19 vaccination per day. Split into effective (green) and ineffective (blue) cases has been artificially carried out by utilising an efficacy estimation of  $\epsilon \sim 65\%$ . The dashed-grey line marks the target vaccination rate of  $0.2\%d^{-1}$  ( $\sim 140k$  doses per day), also represented as light blue and green bars between April and May 2021 to highlight that these are not real data, as opposed to data from January up to April 2021, taken from official sources.

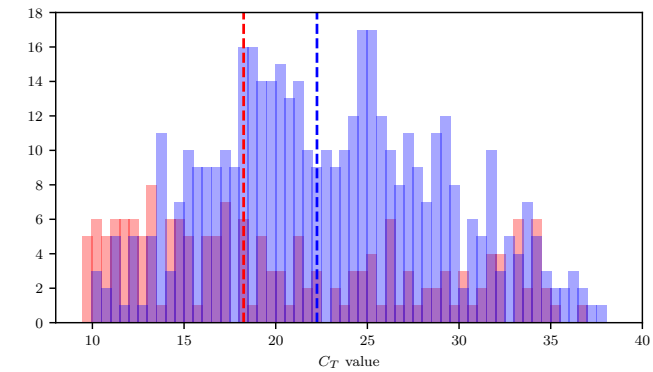

**Fig. 4.** Histogram of  $C_T$  values corresponding to S-negative (red bars) and S-positive (blue bars) of ORF positive samples. The median  $C_T$  values for each distribution are shown as dashed lines. Data from Ref. (9).

and would allow for the study of when and how the pandemic-endemic transition will occur. However, it must wait up until conclusive data is gathered regarding such immunity loss process. Another exciting avenue would be the coupling of the model with a model for the population dynamics, which would permit interrogation of the effects of spatial heterogeneities in the evolution of the pandemic. A similar connection with the basic SIR model has been recently introduced in Ref. (18) by using a generalised diffusion equation, also referred to as dynamical-density functional theory DDFT. This work could be nicely extended by coupling the basic DDFT equation with our controlled SIR model. Additionally, more general DDFT versions can be used to incorporate the effect of mobility anisotropies and “hydrodynamic interactions” (19, 20). Last but not least, the effects of fluctuations, inherent to complex systems, could be accounted for by using fluctuating DDFT as a model for the population dynamics (21, 22).

### Higher-transmission evidence?

**Insufficient statistics in QPCR tests.** In a recent study Kidd *et al.* (9) examined the presence of SARS-CoV-2 in respiratory samples using the ThermoFisher TaqPath RT-QPCR test. They found that a considerable number of such samples exhibited a characteristic mutation of the lineage B.1.1.7, namely the  $\Delta 69/70$  deletion. This mutation induces a failure in detecting the S-gene (“S-gene negative”) of the TaqPath test, but with two other gene targets clearly detectable: ORF and N. Analysing the RT-qPCR threshold-crossing ( $C_T$ ) values originated from both S-gene negative and positive samples, they obtained the data shown in Fig. 4 for the  $C_T$ -value histograms corresponding to ORF-positive samples (in their study both ORF and N-gene targets are shown, but they exhibit similar behavior). Such histograms, where S-negative (B.1.1.7) is red and S-positive is blue, were then used to extract the corresponding median  $C_T$ -values, also shown in Fig. 4: 18.2 (red dashed line) and 22.3 (blue dashed line). From an ensemble point of view, a low  $C_T$  value indicates a high concentration of viral genetic material, and vice versa. And it is precisely this concept the authors used to justify that given the lower median  $C_T$  value of the S-negative samples, the UK variant had a higher viral load. Had the S-negative histogram been at least as good and clear as the S-positive histogram, the conclusion that the B.1.1.7 samples have a higher viral load could

This provides evidence of the predictive capabilities of the model.

Figures 2.c-d reveal the effects of the third lockdown imposed on January 4, 2021 and of the intensive vaccination campaign followed in the UK (see Fig. 3 for the actual number of doses delivered between January and April 2021). Figure 2.c depicts predictions of what would have happened in case the UK had not delivered any vaccines during the first quarter of 2021. In contrast, Fig. 2.d shows predictions taking into account both the third lockdown just mentioned, and publicly available vaccination campaign data up until April 10, 2021, assuming a conservative 65% efficacy of the vaccine, and stopping vaccination thereafter. As can be seen, had it not been for the very successful vaccination strategy adopted by the UK (exceeding on average the original vaccination target set in January 2021 (14)), the country would be currently facing a new and tremendous wave. This was already forecasted in January 2021 using an early version of the model developed here (15), which was recently confirmed in Ref. (16). In a very recent news article (17) the UK Prime Minister attributed the reduction of new CoVid-19 infections mainly to the lockdown. While the lockdown has certainly contributed to a temporal slowdown of the curve having an immediate effect, as illustrated in Fig 2.c, it appears that the sustained slowdown of the curve is due to a combined effect of lockdown and vaccination campaign, Figs 2.d-e, with eventual flattening of the curve for sufficiently high vaccination rate, as shown in Fig. 2.f. In fact, Figs 2.e-f uncover a more optimistic scenario for the rest of the year 2021 by simply maintaining a vaccination rate in the range between  $70 \times 10^3 d^{-1}$  and  $140 \times 10^3 d^{-1}$ , respectively. What is more, if a target of  $140 \times 10^3 d^{-1}$  is met, the UK could be returning to pre-CoVid-19 normality as early as June 2021.

**Future refinements of the model.** There is a number of interesting questions related to the analysis presented here and a discussion of extensions of the model is in order. A first question would be the effect of immunity loss after vaccination, which would involve a new transition  $R_V \rightarrow S$  in Fig. 1.c. This enhancement of the model should not entail a major difficulty

253 have been defended (whether this means higher transmission  
 254 rates or not would require further analysis). However, it is  
 255 clear that the statistics of the S-negative is poor to enable  
 256 concrete conclusions from the comparison of its median with  
 257 the S-positive counterpart. Even more so, there is a subtler  
 258 and more problematic issue when contrasting  $C_T$  values: the  
 259 lack of infection synchronisation between patients makes it  
 260 difficult, if not impossible, to unequivocally justify that lower  
 261  $C_T$  values mean higher transmission rates. For this to be true,  
 262 the samples should come from patients who have been infected  
 263 for the same amount of time. Otherwise, by pure chance we  
 264 could be comparing people at an early stage, of whom a lower  
 265 viral load, in general, is expected, against patients who have  
 266 been infected for a longer time, hence with higher viral loads.  
 267 In any case, it is clear from Fig. 4 that the median  $C_T$  values  
 268 extracted from such histograms are not sufficient to establish a  
 269 clear difference between the viral-load distributions observed.

270 **Enhanced binding does not equal enhanced infection.** Protein-  
 271 protein interactions play a pivotal role in the docking and entry  
 272 stages of viral infections. In the particular case of SARS-CoV-  
 273 2, the spike-like protein on the surface of the virus binds to  
 274 the human cells primarily via interaction with the angiotensin-  
 275 converting enzyme 2, or simply ACE2 “receptor.” Therefore,  
 276 ACE2 acts as a cellular doorway for the SARS-CoV-2. Mu-  
 277 tations on the spike protein, as is the case of the B.1.1.7, can  
 278 affect the stability of the binding, and hence the infective  
 279 capability of the virus. Using a large number of molecular dy-  
 280 namics (MD) trajectories of different spike protein interactions  
 281 with the human target protein (ACE2), a recent in-silico study  
 282 has reported that mutations of the UK variant has greatly  
 283 stabilised the interaction with the ACE2, which in turned has  
 284 enhanced the binding stability (23). The study conjectures  
 285 that the enhanced binding associated with the spike mutations  
 286 of the B.1.1.7 lineage might be responsible for a higher trans-  
 287 missibility of the SARS-CoV-2 virus. However, the binding of the  
 288 viral particle with the surface receptor of the host cell is only  
 289 one of the several and complex processes involved in a viral  
 290 infection (24). For instance, it can happen that the mutation  
 291 provides the virus with a more stable binding, but follow-  
 292 ing binding the virion remains attached to the cell surface  
 293 without being internalised (which leads to viral replication)  
 294 by the cell for longer times, which could potentially result  
 295 in even slower infection rates. Even if the binding is better  
 296 and, say, the internalisation effectiveness is the same for all  
 297 the mutations, this only ensures evolutionary displacement of  
 298 the lesser stable by the more stable binding, and not higher  
 299 infection rates. The only way to assert that a given mutation  
 300 yields a higher infection rate would be by measuring a higher  
 301 number of virions newly formed inside the cell over a similar  
 302 time period, which is entirely dependent of the cell machinery  
 303 itself. Thus, by only having evidence of an improved binding  
 304 capacity, it seems reasonable to assume that the same amount  
 305 of virions per second will be produced by using the same cell  
 306 machinery, which means the same infection rate. In fact, the  
 307 improved binding associated with the UK variant offers a good  
 308 justification for the dominance of the B.1.1.7 lineage observed  
 309 elsewhere (25, 26), but it does not represent a good basis to  
 310 justify a higher transmissibility/infection rate.

## 311 Methods

**Population dynamics.** The population is split into four groups: sus-  
 ceptible ( $S$ ), infected ( $I$ ), recovered ( $R$ ) and vaccinated ( $V$ ), as il-  
 lustrated in Fig.1. The vaccinated group consists of two sub-groups:  
 susceptible ( $S_V$ ) due to ineffective vaccination; and recovered ( $R_V$ )  
 due to effective vaccination. The groups follow the delayed dynam-  
 ical system:

$$\begin{aligned} \frac{dS}{dt} &= -\frac{SI}{N}(1 - \mathfrak{A}(t - \tau))\beta - \Theta(t - t_\nu)\nu(t)N \\ \frac{dS_V}{dt} &= -\frac{S_V I}{N}(1 - \mathfrak{A}(t - \tau))\beta + \Theta(t - t_\nu)(1 - \epsilon)\nu(t)N \\ \frac{dI}{dt} &= \frac{(S + S_V)I}{N}(1 - \mathfrak{A}(t - \tau))\beta - \alpha I \end{aligned} \quad [1]$$

where  $R + R_V = \int_0^t ds (\alpha I(s) + \nu_{\text{eff}}(s)N)$ ,  $N = S + S_V + I + R + R_V$  312  
 is the total population, assumed  $N \approx 66.6$  million,  $\Theta(t - t_\nu)$  is the 313  
 Heaviside step function,  $t_\nu$  is the onset of the vaccination campaign, 314  
 $\nu$  is the vaccination rate per day normalised to the total population, 315  
 and  $\nu_{\text{eff}} = \epsilon\nu(t)$  with  $\epsilon \in [0, 1]$  is the vaccine efficacy. The param- 316  
 eters  $\beta$  and  $\alpha$ , are the transmission and recovery rates, respectively, 317  
 and the function  $\mathfrak{A}(t - \tau)$  is the percentage of susceptible people using 318  
 effective preventive measures at time  $t - \tau$  ( $\tau$  being a characteristic 319  
 time for such preventive measures to become apparent, assumed 14 320  
 days, the incubation period (27)), with general functional form: 321  

$$\mathfrak{A}(t) = \sum_k \frac{\eta^k}{2} \left\{ \left( 1 + \operatorname{erf} \left( \frac{t - t_0^k}{\delta_i} \right) \right) - \left( 1 + \operatorname{erf} \left( \frac{t - (t_0^k + T^k)}{\delta_r} \right) \right) \right\},$$
 322  
 where  $\eta^k \in [0, 1]$  is the effectiveness of the preventive measures 323  
 taken in the  $k$ -th wave,  $T^k$  is related to the time extension of these 324  
 measures, and  $\delta_{i,r}$  are the social inertia ( $i$ ) and relaxation ( $r$ ) time 325  
 scales, respectively. With  $\mathfrak{A} = 0$  and  $\nu = 0$ , Eq. (1) becomes the 326  
 free SIR model. For  $\mathfrak{A} \neq 0$  we get a controlled SIR model. The 327  
 initial condition used:  $I_0 = 1$  (number of infective cases reported 328  
 on January 11, 2020),  $S_0 = N - I_0$  and  $R_0 = V_0 = 0$ . Thus, fitting 329  
 of five parameters is needed, and this is done at the first wave only. 330

**Training and testing the model.** The full dataset,  $Y$ , was re- 331  
 normalised to  $\tilde{Y}$ , by using a linear fit,  $z = b + mx$ , to the number of 332  
 daily CoVid-19 tests per thousand people given in Ref. (28), with 333  
 $b = 0$  and  $m = 0.0191 \text{ test}/10^3 \text{ people/d}$  (from 0 to 7 test/ $10^3$  people 334  
 in 366 days), so that  $\tilde{Y} = (1 + (\frac{1}{z} - \frac{1}{z_{\text{last}}}))Y$ . We then use non- 335  
 linear least squares to fit the daily new cases  $\Delta = \frac{d(I+R)}{dt}$  to the 336  
 first-wave data (training dataset). This fitting yields for the free 337  
 model:  $\beta = 0.475 \text{d}^{-1}$  and  $\alpha = 0.381 \text{d}^{-1}$  so that  $\mathcal{R}_0 = \frac{\beta}{\alpha} \simeq 1.23$ . 338  
 For the controlled model we get:  $\beta = 0.209 \text{d}^{-1}$ ,  $\alpha = 0.102 \text{d}^{-1}$ , 339  
 $\eta = 0.65$ ,  $\delta_i = 21 \text{d}$  and  $\delta_r = 45 \text{d}$ , which yields  $\mathcal{R}_0 \simeq 2.042$ . To 340  
 test the models we numerically integrate Eq. (1) for both cases, 341  
 i.e.,  $\mathfrak{A}(t) = 0$  and  $\mathfrak{A}(t) \neq 0$ . The controlled-model prediction for 342  
 new infections grows exponentially as of September 2020 (testing 343  
 dataset) when the first wave of preventive measures would van- 344  
 ish according to the summer trend. With  $\delta_{i,r}$  fixed from the first 345  
 wave, we fit the parameters  $\eta$  and  $T$  of a second social response 346  
 to unveil the behavioural changes adopted against the apparent 347  
 second wave of cases, obtaining a maximum of social response by 348  
 mid-end October 2020. This appears to be in agreement with the 349  
 declaration of the UK Prime Minister of “seeing a second wave” on 350  
 September 18, 2020 (12), and his statement on coronavirus where the 351  
 three-tier restrictions system was imposed, October 12, 2020 (13). 352  
 For predictions as of January 2021, we introduce a third wave of 353  
 measures with  $\eta = 0.70$ , starting in January and ending in April 354  
 2021,  $T = 90 \text{d}$ , which represents the current contagion policies 355  
 being taken by the UK government. Finally, we use the official 356  
 number of first doses delivered in the UK in conjunction with two 357  
 scenarios as of April 10, 2021:  $\nu_1 = 0.1\% \text{d}^{-1} (\sim \frac{70 \times 10^3}{N} \text{d}^{-1})$  and 358  
 $\nu_2 = 0.2\% \text{d}^{-1} (\sim \frac{140 \times 10^3}{N} \text{d}^{-1})$ . 359

**Error propagation and uncertainty quantification.** For the computa- 360  
 tion of the uncertainty areas showed along with the model sim- 361  
 ulations in Fig. 2, we used the common first-order truncation of 362  
 the Taylor’s expansion of the law of propagation of uncertainty 363  
 method (29, 30), given the numerical errors calculated after fitting 364  
 the parameters of the model to data during the training stage. 365

366 **Data Availability.** All data for the analysis was collected  
367 from <https://coronavirus.data.gov.uk/>. Specifically, new cases:  
368 <https://coronavirus.data.gov.uk/details/cases>, and vaccinations:  
369 <https://coronavirus.data.gov.uk/details/vaccinations>.

370 **Code Availability.** The code used in the creation of this manuscript  
371 is available at <https://github.com/migduroli/covid-uk-variant/>.  
372 Model simulations were numerically integrated using `odeint` from  
373 `scipy` (31), a Python wrapper for LSODA from the FORTRAN library  
374 ODEPACK (32). The non-linear square fittings were carried out by  
375 using `curve_fit` from `scipy` (31).

376 **ACKNOWLEDGMENTS.** We acknowledge financial support from  
377 the Engineering and Physical Sciences Research Council of the UK  
378 via Platform Grant No. EP/L020564/1.

- 379 1. H. Else. How a torrent of COVID science changed research publishing - in seven charts.  
380 Nature. 588(7839):553 (2020).
- 381 2. W. O. Kermack, A. G. McKendrick, A Contribution to the Mathematical Theory of Epidemics.  
382 Proc. R. Soc. A. 115 (772): 700–721 (1927).
- 383 3. G. G. Katull, *et al.* Global convergence of COVID-19 basic reproduction number and estima-  
384 tion from early-time SIR dynamics, PLoS ONE 15(9): e0239800 (2020)
- 385 4. U. Nguemdjo, F. Meno, A. Dongfack, B. Ventelou. Simulating the progression of the COVID-19  
386 disease in Cameroon using SIR models. PLoS ONE 15(8): e0237832 (2020)
- 387 5. I. Cooper, A. Mondal, C. G. Antonopoulos. A SIR model assumption for the spread of COVID-  
388 19 in different communities, Chaos Soliton. Fract. 139: 110057 (2020)
- 389 6. J. S. Weitz, *et al.* Modeling shield immunity to reduce COVID-19 epidemic spread. Nat. Med.  
390 26 849–854 (2020)
- 391 7. Bjørnstad, O.N., Shea, K., Krzywinski, M. *et al.* The SEIRS model for infectious disease  
392 dynamics. Nat, Methods 17, 557–558 (2020)
- 393 8. J. Macfarlane. New Covid strain UK: what are the symptoms of the new coro-  
394 navirus variant - and will the vaccine still work? *The Scotsman*, 11 Janu-  
395 ary 2021, [https://www.scotsman.com/health/coronavirus/new-covid-strain-uk-what-are-](https://www.scotsman.com/health/coronavirus/new-covid-strain-uk-what-are-symptoms-new-coronavirus-variant-and-will-vaccine-still-work-3068541)  
396 [symptoms-new-coronavirus-variant-and-will-vaccine-still-work-3068541](https://www.scotsman.com/health/coronavirus/new-covid-strain-uk-what-are-symptoms-new-coronavirus-variant-and-will-vaccine-still-work-3068541)
- 397 9. M. Kidd, *et al.* S-variant SARS-CoV-2 lineage B.1.1.7 is associated with significantly higher  
398 viral loads in samples tested by ThermoFisher TaqPath RT-qPCR, J. Infect. Dis. (2021)
- 399 10. M. Voysey, *et al.* Safety and efficacy of the ChAdOx1 nCoV-19 vaccine (AZD1222) against  
400 SARS-CoV-2: an interim analysis of four randomised controlled trials in Brazil, South Africa,  
401 and the UK. Lancet 397: 99 (2021)
- 402 11. Coronavirus: Hancock concern over 'sharp rise' in cases, *BBC News* 8 September 2020,  
403 <https://www.bbc.com/news/uk-54066831>
- 404 12. Covid: UK seeing second wave, says Boris Johnson, *BBC News* 18 September 2020,  
405 <https://www.bbc.com/news/av/uk-54213129>
- 406 13. PM Commons statement on coronavirus, *Prime Minister's Office*, 12 October  
407 2020, [https://www.gov.uk/government/speeches/pm-commons-statement-on-coronavirus-](https://www.gov.uk/government/speeches/pm-commons-statement-on-coronavirus-12-october-2020)  
408 [12-october-2020](https://www.gov.uk/government/speeches/pm-commons-statement-on-coronavirus-12-october-2020)
- 409 14. M. Dathan, H. Cole, K. Ferguson, N. Clark. Boris Johnson vows to deliver 200,000 vac-  
410 cines a day by next week & every care home resident this month, *The Sun*, 7 Jan-  
411 uary 2021, [https://www.thesun.co.uk/news/13672615/covid-vaccine-press-conference-boris-](https://www.thesun.co.uk/news/13672615/covid-vaccine-press-conference-boris-johnson-hundreds)  
412 [johnson-hundreds](https://www.thesun.co.uk/news/13672615/covid-vaccine-press-conference-boris-johnson-hundreds)
- 413 15. M. A. Durán-Olivencia, S. Kalliadasis. Understanding soaring coronavirus  
414 cases and the effect of contagion policies in the UK, preprint. url:  
415 <https://www.medrxiv.org/content/10.1101/2021.01.30.21250822v1>
- 416 16. L.K. Whittles *et al.* "Unlocking" Roadmap Scenarios for England v2, 22 Febru-  
417 ary 2021 [https://www.gov.uk/government/publications/imperial-college-london-unlocking-](https://www.gov.uk/government/publications/imperial-college-london-unlocking-roadmap-scenarios-for-england-18-february-2021)  
418 [roadmap-scenarios-for-england-18-february-2021](https://www.gov.uk/government/publications/imperial-college-london-unlocking-roadmap-scenarios-for-england-18-february-2021).
- 419 17. COVID-19: Lockdown is main reason for drop in coronavirus cases and deaths - not vaccina-  
420 tions, says Boris Johnson, *SkyNews* 14 April 2021, <https://www.bbc.com/news/uk-54066831>
- 421 18. M. te Vrugt, J. Bickmann, R. Wittkowski. Effects of social distancing and isolation on epidemic  
422 spreading modeled via dynamical density functional theory, Nat. Comm. 11: 5576 (2020)
- 423 19. B. D. Goddard, A. Nold, N. Savva, G. A. Pavliotis, S. Kalliadasis. General dynamical density  
424 functional theory for classical fluid, Phys. Rev. Lett. 109: 120603 (2012).
- 425 20. M. A. Durán-Olivencia, B. D. Goddard, S. Kalliadasis. Dynamical Density Functional Theory  
426 for Orientable Colloids Including Inertia and Hydrodynamic Interactions, J. Stat. Phys. 164:  
427 785–809 (2016)
- 428 21. M. A. Durán-Olivencia, P. Yatsyshin, B. D. Goddard, S. Kalliadasis. General framework for  
429 fluctuating dynamic density functional theory, New J. Phys. 19: 123022 (2017)
- 430 22. A. Russo, M. A. Durán-Olivencia, P. Yatsyshin, S. Kalliadasis. Memory effects in fluctuating  
431 dynamic density-functional theory: theory and simulations, J. Phys. A: Math. Theor. 53:  
432 445007 (2020)
- 433 23. P. Rynkiewicz, G.A. Babbitt, F. Cui, A.O. Hudson, M.L. Lynch. A compar-  
434 ative survey of Betacoronavirus binding dynamics relevant to the functional  
435 evolution of the highly transmissible SARS-CoV-2 variant N501Y, preprint. url:  
436 <https://www.biorxiv.org/content/10.1101/2020.09.11.293258v2>
- 437 24. L. Makowski, W. Olson-Sidford, J. W. Weisel. Biological and Clinical Consequences of Integrin  
438 Binding via a Rogue RGD Motif in the SARS CoV-2 Spike Protein. Viruses 13(2):146 (2021).
- 439 25. Kent Covid variant "likely to sweep globe" and become world's dominant strain, *Mirror*,  
440 11 February 2021, [https://www.mirror.co.uk/news/uk-news/uks-migrant-covid-19-variant-](https://www.mirror.co.uk/news/uk-news/uks-migrant-covid-19-variant-23480531)  
441 [23480531](https://www.mirror.co.uk/news/uk-news/uks-migrant-covid-19-variant-23480531)

26. UK variant is now the dominant coronavirus strain in the US, says CDC chief, *CNN* 7 April 2021, [https://edition.cnn.com/2021/04/07/us/uk-variant-dominant-coronavirus-](https://edition.cnn.com/2021/04/07/us/uk-variant-dominant-coronavirus-strain/index.html)  
442 [strain/index.html](https://edition.cnn.com/2021/04/07/us/uk-variant-dominant-coronavirus-strain/index.html)
27. S. A. Lauer SA, *et al.* The Incubation Period of Coronavirus Disease 2019 (COVID-19) From  
443 Publicly Reported Confirmed Cases: Estimation and Application. Ann Intern Med. 172 (9):  
444 577-582 (2020)
28. J. Hasell, *et al.* A cross-country database of CoVid-19 testing. Sci. Data 7, 345 (2020). 448
29. H. H. Ku. Notes on the use of propagation of error formulas, J. Res. Natl. Bur. Stand., 70C  
449 (4): 262 (1966)
30. S. Mekid, D.Vaja. Propagation of uncertainty: Expressions of second and third order uncer-  
450 tainty with third and fourth moments, Measurement 41(6): 600–609 (2008) 452
31. P. Virtanen, *et al.* SciPy 1.0: Fundamental Algorithms for Scientific Computing in Python, Nat.  
453 Methods 17, 261–272 (2020)
32. A. C. Hindmarsh. ODEPACK, A Systematized Collection of ODE Solvers, Scientific Comput-  
454 ing, R. S. Stepleman *et al.* (eds.), North-Holland, Amsterdam, vol. 1: 55-64 (1983) 455  
456

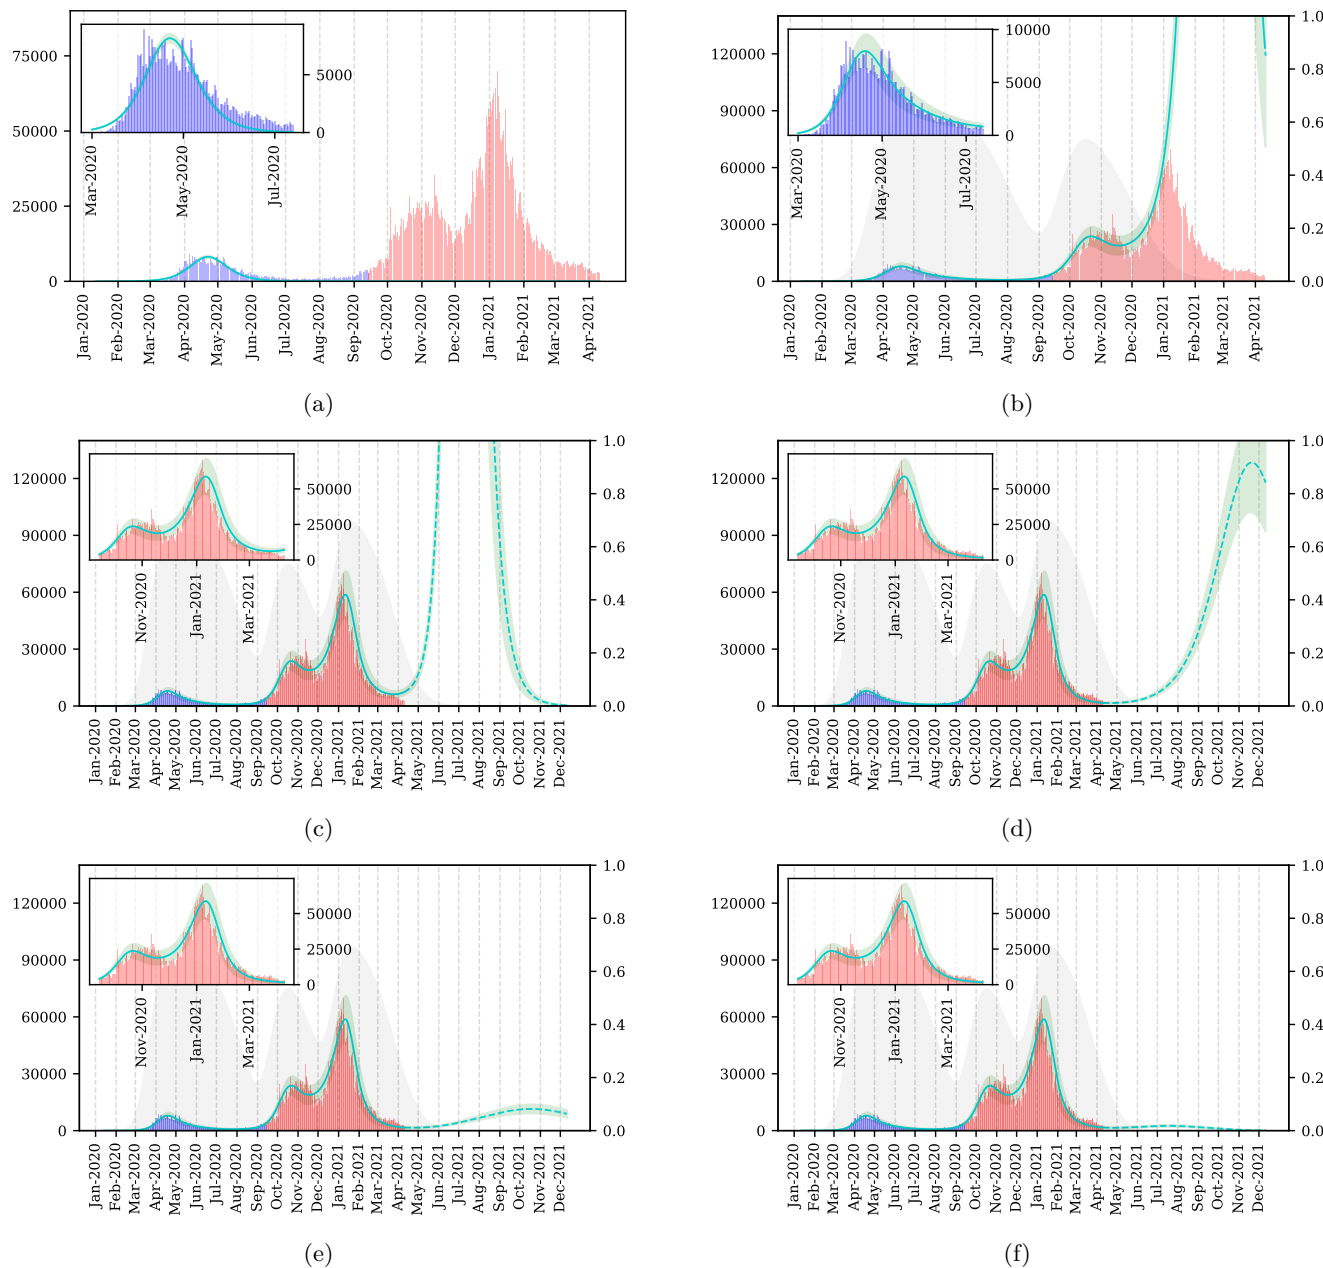

**Fig. 2.** SARS-CoV-2 new daily cases (left axis): blue bars for first-wave data used to fit free and controlled SIR models (light-green lines), red bars for second- and third-wave data used to test the models and their predictions (light-green dashed lines), green areas represent the model uncertainty due to the absolute error of the fitting parameters. (a) Free SIR model captures the essence of the time evolution of new CoVid-19 cases over March-July 2020 (inset plot), but totally fails to predict the second and third waves. (b) Controlled SIR model without vaccination fits better to first-wave data (inset plot) than the free version. The gray area represents the effectiveness of preventive measures,  $\mathfrak{A}(t)$  (right axis). The first wave of social awareness is fit together with  $\beta$  and  $\alpha$ , showing a maximum of effectiveness  $\eta_1 \simeq 65\%$ , social inertia  $\delta_i \simeq 21$  d, and social relaxation starting at mid June 2020, with prediction of no measures in  $\delta_r \simeq 45$  d after relaxation begins. The second wave of social awareness begins in September (confirmed by Prime Minister (12)), reaching  $\eta_2 \simeq 60\%$  by mid October 2020 (three-tier system was introduced (13)). The upsurge of CoVid-19 cases in December 2020 is again a consequence of social relaxation. (c)-(e) Controlled SIR model with with a third-wave of preventive measures (reaching maximum effectiveness,  $\eta_3 = 70\%$ , by the mid January 2021), along with the following casuistry for vaccination: (c) no vaccination, (d)-(f) actual vaccination data from January up to April 10, 2021. Panel (d) shows the effect of stopping vaccination right after April 10, 2021, whilst (e)-(f) reveals a dramatic decrease in infections if maintaining the vaccination rate at  $\sim 70 \times 10^3$  and  $\sim 140 \times 10^3$  vaccines per day, respectively. Even with a lower vaccination rate than the mean vaccination rate kept between January and April 2021 ( $\sim 335 \times 10^3$  per day), the UK could be restoring to normal (pre-pandemic) life by June 2021 without risk of a new wave.
